# Supplementary material for: Potential application of hydrological ensemble prediction in forecasting floods and its components over the Yarlung Zangbo River basin, China
Source: Copernicus journal article supplement (doi:10.5194/hess-23-3335-2019), 2019-08-14
Supplement: Supplementary file 1 [file hess-23-3335-2019-supplement.pdf]

Supplement of Hydrol. Earth Syst. Sci., 23, 3335–3352, 2019  
<https://doi.org/10.5194/hess-23-3335-2019-supplement>  
© Author(s) 2019. This work is distributed under  
the Creative Commons Attribution 4.0 License.

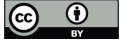

*Supplement of*

**Potential application of hydrological ensemble  
prediction in forecasting floods and its components  
over the Yarlung Zangbo River basin, China**

**Li Liu et al.**

*Correspondence to:* Yue Ping Xu ([yuepingxu@zju.edu.cn](mailto:yuepingxu@zju.edu.cn))

The copyright of individual parts of the supplement might differ from the CC BY 4.0 License.

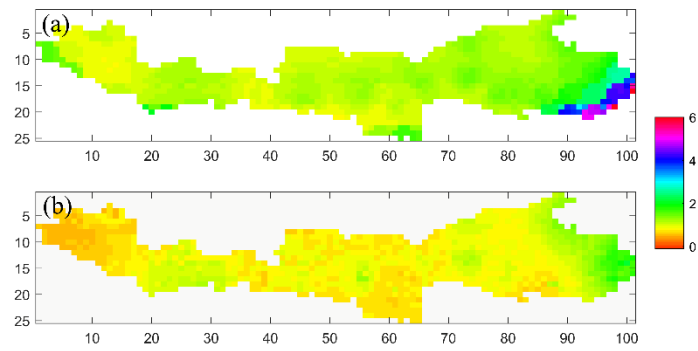

**S1. Spatial patterns of CRPS for ECMWF QPF for lead time of 3 day during wet season (May to September). (a) CRPS for raw forecasts and (b) CRPS for post-processed QPF by QM-SS.**
